# Supplementary material for: Ageing affects subtelomeric DNA methylation in blood cells from a large European population enrolled in the MARK-AGE study
Source: Springer Nature journal article supplement (doi:10.1007/s11357-021-00347-9), 2021-04-19
Supplement: MOESM2 [file 11357_2021_347_MOESM2_ESM.pdf]

Table S1

| Subtelomere |           | Age group   | 35                                          | 45                                        | 55                                        | 65                                          | P KW*   | P GLM <sup>†</sup> |
|-------------|-----------|-------------|---------------------------------------------|-------------------------------------------|-------------------------------------------|---------------------------------------------|---------|--------------------|
|             |           | Stat        | a                                           | b                                         | c                                         | d                                           |         |                    |
| 5p          | CpG 1     | Median<br>N | 0.680 (0.630-0.740) <sup>b,c,d</sup><br>467 | 0.700 (0.640-0.760) <sup>a,d</sup><br>543 | 0.715 (0.660-0.760) <sup>a</sup><br>572   | 0.720 (0.660-0.775) <sup>a,b</sup><br>548   | < 0.001 | < 0.001            |
|             | CpG 2     | Median<br>N | 0.760 (0.695-0.810) <sup>d</sup><br>460     | 0.760 (0.700-0.810) <sup>d</sup><br>521   | 0.760 (0.710-0.830)<br>575                | 0.780 (0.710-0.830) <sup>a,b</sup><br>540   | 0.014   | 0.037              |
|             | CpG 5     | Median<br>N | 0.640 (0.560-0.700) <sup>c,d</sup><br>469   | 0.650 (0.580-0.710)<br>532                | 0.650 (0.590-0.730) <sup>a</sup><br>583   | 0.660 (0.580-0.750) <sup>a</sup><br>557     | < 0.001 | < 0.001            |
|             | 5p mean   | Median<br>N | 0.763 (0.735-0.795) <sup>c,d</sup><br>468   | 0.773 (0.738-0.805) <sup>d</sup><br>537   | 0.778 (0.743-0.810) <sup>a</sup><br>579   | 0.788 (0.750-0.818) <sup>a,b</sup><br>552   | < 0.001 | < 0.001            |
| 21q         | CpG 1.2   | Median<br>N | 0.430 (0.360-0.520)<br>469                  | 0.430 (0.370-0.510)<br>533                | 0.440 (0.360-0.520)<br>578                | 0.450 (0.370-0.540)<br>551                  | 0.660   | 0.018              |
|             | CpG 3     | Median<br>N | 0.480 (0.410-0.550) <sup>d</sup><br>466     | 0.480 (0.420-0.560) <sup>d</sup><br>535   | 0.480 (0.420-0.560)<br>572                | 0.500 (0.420-0.590) <sup>a,b</sup><br>553   | 0.002   | < 0.001            |
|             | CpG 4     | Median<br>N | 0.640 (0.560-0.730)<br>468                  | 0.650 (0.580-0.720)<br>538                | 0.650 (0.570-0.730)<br>579                | 0.660 (0.570-0.755)<br>560                  | 0.047   | 0.009              |
|             | CpG 5     | Median<br>N | 0.390 (0.340-0.460) <sup>d</sup><br>467     | 0.400 (0.350-0.450)<br>535                | 0.400 (0.340-0.460)<br>577                | 0.410 (0.350-0.480) <sup>a</sup><br>554     | 0.016   | 0.002              |
|             | CpG 8     | Median<br>N | 0.560 (0.490-0.620) <sup>d</sup><br>465     | 0.560 (0.500-0.630) <sup>d</sup><br>534   | 0.570 (0.500-0.640) <sup>d</sup><br>579   | 0.590 (0.510-0.670) <sup>a,b,c</sup><br>556 | < 0.001 | < 0.001            |
|             | CpG 10-14 | Median<br>N | 0.650 (0.580-0.710) <sup>d</sup><br>468     | 0.650 (0.590-0.720) <sup>d</sup><br>540   | 0.660 (0.590-0.730) <sup>d</sup><br>581   | 0.670 (0.600-0.750) <sup>a,b,c</sup><br>559 | < 0.001 | < 0.001            |
|             | CpG 15    | Median<br>N | 0.700 (0.640-0.760) <sup>d</sup><br>469     | 0.710 (0.650-0.770) <sup>d</sup><br>540   | 0.710 (0.650-0.780)<br>583                | 0.730 (0.660-0.800) <sup>a,b</sup><br>558   | < 0.001 | < 0.001            |
|             | CpG 16.17 | Median<br>N | 0.580 (0.510-0.660) <sup>d</sup><br>472     | 0.580 (0.520-0.655) <sup>d</sup><br>540   | 0.590 (0.520-0.670) <sup>d</sup><br>584   | 0.610 (0.540-0.700) <sup>a,b,c</sup><br>554 | < 0.001 | < 0.001            |
|             | CpG 18.19 | Median<br>N | 0.640 (0.580-0.700) <sup>c,d</sup><br>466   | 0.650 (0.590-0.720) <sup>d</sup><br>541   | 0.660 (0.600-0.730) <sup>a,d</sup><br>581 | 0.670 (0.610-0.760) <sup>a,b,c</sup><br>558 | < 0.001 | < 0.001            |
|             | CpG 20.21 | Median<br>N | 0.715 (0.660-0.770) <sup>c,d</sup><br>466   | 0.720 (0.670-0.790) <sup>d</sup><br>537   | 0.730 (0.670-0.800) <sup>a</sup><br>586   | 0.750 (0.680-0.820) <sup>a,b</sup><br>556   | < 0.001 | < 0.001            |
|             | 21q mean  | Median<br>N | 0.616 (0.553-0.679) <sup>d</sup><br>473     | 0.623 (0.569-0.690) <sup>d</sup><br>545   | 0.630 (0.564-0.701) <sup>d</sup><br>589   | 0.649 (0.575-0.724) <sup>a,b,c</sup><br>560 | < 0.001 | < 0.001            |

Table S2

|     |            | Parametric*                                                 | Non parametric*                                 |                                                 |
|-----|------------|-------------------------------------------------------------|-------------------------------------------------|-------------------------------------------------|
| 5p  | CpG 1      | Correlation coefficient<br>Sig. (2-tailed)<br>95% C.I.<br>N | 0.149<br>< <b>0.001</b><br>0.108; 0.193<br>2130 | 0.155<br>< <b>0.001</b><br>0.115; 0.199<br>2130 |
|     | CpG 2      | Correlation coefficient<br>Sig. (2-tailed)<br>95% C.I.<br>N | 0.052<br><b>0.018</b><br>0.010; 0.096<br>2096   | 0.068<br><b>0.002</b><br>0.027; 0.110<br>2096   |
|     | CpG 5      | Correlation coefficient<br>Sig. (2-tailed)<br>95% C.I.<br>N | 0.100<br>< <b>0.001</b><br>0.057; 0.142<br>2141 | 0.098<br>< <b>0.001</b><br>0.053; 0.144<br>2141 |
|     | Mean       | Correlation coefficient<br>Sig. (2-tailed)<br>95% C.I.<br>N | 0.132<br>< <b>0.001</b><br>0.090; 0.173<br>2136 | 0.140<br>< <b>0.001</b><br>0.100; 0.192<br>2136 |
| 21q | CpG 1.2    | Correlation coefficient<br>Sig. (2-tailed)<br>95% C.I.<br>N | 0.063<br><b>0.003</b><br>0.025; 0.105<br>2131   | 0.057<br><b>0.008</b><br>0.018; 0.099<br>2131   |
|     | CpG 3      | Correlation coefficient<br>Sig. (2-tailed)<br>95% C.I.<br>N | 0.087<br>< <b>0.001</b><br>0.042; 0.126<br>2126 | 0.080<br>< <b>0.001</b><br>0.035; 0.121<br>2126 |
|     | CpG 4      | Correlation coefficient<br>Sig. (2-tailed)<br>95% C.I.<br>N | 0.059<br><b>0.006</b><br>0.017; 0.102<br>2145   | 0.049<br><b>0.022</b><br>0.007; 0.095<br>2145   |
|     | CpG 5      | Correlation coefficient<br>Sig. (2-tailed)<br>95% C.I.<br>N | 0.072<br><b>0.001</b><br>0.030; 0.116<br>2133   | 0.064<br><b>0.003</b><br>0.021; 0.104<br>2133   |
|     | CpG 8      | Correlation coefficient<br>Sig. (2-tailed)<br>95% C.I.<br>N | 0.108<br>< <b>0.001</b><br>0.062; 0.149<br>2134 | 0.096<br>< <b>0.001</b><br>0.053; 0.138<br>2134 |
|     | 10.11.12.1 | Correlation coefficient<br>Sig. (2-tailed)<br>95% C.I.<br>N | 0.096<br>< <b>0.001</b><br>0.055; 0.134<br>2148 | 0.091<br>< <b>0.001</b><br>0.048; 0.135<br>2148 |
|     | CpG 15     | Correlation coefficient<br>Sig. (2-tailed)<br>95% C.I.<br>N | 0.101<br>< <b>0.001</b><br>0.056; 0.141<br>2150 | 0.099<br>< <b>0.001</b><br>0.060; 0.142<br>2150 |
|     | CpG 16.17  | Correlation coefficient<br>Sig. (2-tailed)<br>95% C.I.<br>N | 0.103<br>< <b>0.001</b><br>0.062; 0.143<br>2150 | 0.098<br>< <b>0.001</b><br>0.057; 0.140<br>2150 |
|     | CpG 18.19  | Correlation coefficient<br>Sig. (2-tailed)<br>95% C.I.<br>N | 0.132<br>< <b>0.001</b><br>0.090; 0.174<br>2146 | 0.128<br>< <b>0.001</b><br>0.085; 0.166<br>2146 |
|     | CpG 20.21  | Correlation coefficient<br>Sig. (2-tailed)<br>95% C.I.<br>N | 0.118<br>< <b>0.001</b><br>0.076; 0.160<br>2145 | 0.114<br>< <b>0.001</b><br>0.072; 0.155<br>2145 |
|     | Mean       | Correlation coefficient<br>Sig. (2-tailed)<br>95% C.I.<br>N | 0.111<br>< <b>0.001</b><br>0.065; 0.156<br>2146 | 0.105<br>< <b>0.001</b><br>0.063; 0.148<br>2146 |

Table S3

|   | Method                                                                    | Method details                                 | R vs Age (Pearson) | p       | R vs Age (Spearman) | p       |
|---|---------------------------------------------------------------------------|------------------------------------------------|--------------------|---------|---------------------|---------|
| 1 | Linear Regression                                                         | All variables entered in a single step (Enter) | 0.176              | < 0.001 | 0.174               | < 0.001 |
| 2 | Linear Regression                                                         | Stepwise                                       | 0.162              | < 0.001 | 0.160               | < 0.001 |
| 3 | Linear Regression                                                         | Backward                                       | 0.167              | < 0.001 | 0.163               | < 0.001 |
| 4 | Automatic Linear regression                                               | Standard Model (Forward method)                | 0.153              | < 0.001 | 0.155               | < 0.001 |
| 5 | Automatic Linear regression                                               | Standard Model (Enter method)                  | 0.158              | < 0.001 | 0.156               | < 0.001 |
| 6 | Automatic Linear regression                                               | Boosting (Enter method)                        | 0.156              | < 0.001 | 0.162               | < 0.001 |
| 7 | Linear Regression (after log transformation)                              | All variables entered in a single step (Enter) | 0.172              | < 0.001 | 0.171               | < 0.001 |
| 8 | Linear regression with variables selected by Principal Component Analysis | Factor Analysis                                | 0.133              | < 0.001 | 0.132               | < 0.001 |

Table S4

Linear regression model\*

| R     | R <sup>2</sup> | Adjusted R <sup>2</sup> | Estimate S.E. | F (anova) | Sig. (anova) |
|-------|----------------|-------------------------|---------------|-----------|--------------|
| 0.254 | 0.065          | 0.058                   | 11.009        | 10.330    | < 0.001      |

| Coefficients |            | USTD    |        | STD    |        |         | Bootstrap for Coefficients |        |       | 95% C.I. |         |
|--------------|------------|---------|--------|--------|--------|---------|----------------------------|--------|-------|----------|---------|
|              |            | B       | S.E.   | Beta   | t      | Sig.    | Bias                       | S.E.   | Sig.  | Lower    | Upper   |
|              | (Constant) | 21.206  | 4.516  |        | 4.696  | < 0.001 | 0.076                      | 4.413  | 0.001 | 12.427   | 29.883  |
| 5p           | CpG 1      | 17.567  | 3.278  | 0.124  | 5.360  | < 0.001 | 0.012                      | 3.224  | 0.001 | 11.500   | 23.882  |
|              | CpG 2      | 2.043   | 3.009  | 0.016  | 0.679  | 0.497   | 0.016                      | 3.121  | 0.520 | -3.603   | 8.159   |
|              | CpG 5      | 7.568   | 2.485  | 0.069  | 3.045  | 0.002   | -0.031                     | 2.504  | 0.001 | 2.641    | 12.413  |
| 21q          | CpG 1.2    | -1.100  | 3.830  | -0.011 | -0.287 | 0.774   | -0.116                     | 3.717  | 0.757 | -8.739   | 5.916   |
|              | CpG 3      | 6.686   | 6.997  | 0.062  | 0.956  | 0.339   | 0.081                      | 6.680  | 0.315 | -6.970   | 20.291  |
|              | CpG 4      | -23.427 | 5.246  | -0.235 | -4.466 | < 0.001 | 0.133                      | 5.047  | 0.001 | -32.629  | -13.344 |
|              | CpG 5      | -1.450  | 7.021  | -0.011 | -0.207 | 0.836   | -0.134                     | 7.093  | 0.834 | -14.246  | 11.993  |
|              | CpG 8      | -2.368  | 11.177 | -0.022 | -0.212 | 0.832   | -0.242                     | 11.029 | 0.818 | -23.953  | 18.021  |
|              | CpG 10-14  | -19.228 | 10.812 | -0.162 | -1.778 | 0.075   | -0.560                     | 11.052 | 0.083 | -39.824  | 0.334   |
|              | CpG 15     | 10.848  | 9.198  | 0.084  | 1.179  | 0.238   | -0.111                     | 9.173  | 0.250 | -6.926   | 28.140  |
|              | CpG 16.17  | -5.261  | 12.636 | -0.048 | -0.416 | 0.677   | 0.380                      | 11.870 | 0.689 | -28.755  | 18.476  |
|              | CpG 18.19  | 35.614  | 11.300 | 0.292  | 3.152  | 0.002   | 0.519                      | 11.277 | 0.004 | 13.066   | 58.387  |
|              | CpG 20.21  | 20.190  | 11.534 | 0.151  | 1.751  | 0.080   | -0.121                     | 11.262 | 0.073 | -1.144   | 41.303  |

Table S5

|                         | Stat | N    | Median (IQ)                                 | P KW <sup>s</sup> |
|-------------------------|------|------|---------------------------------------------|-------------------|
| <b>Age group, RASIG</b> |      |      |                                             |                   |
| <b>35</b>               | a    | 494  | 54.828 ( 53.106 - 56.465 ) <sup>b,c,d</sup> | <b>&lt;0.001</b>  |
| <b>45</b>               | b    | 576  | 55.215 ( 53.375 - 57.389 ) <sup>a,c,d</sup> |                   |
| <b>55</b>               | c    | 628  | 56.106 ( 54.214 - 58.007 ) <sup>a,b,d</sup> |                   |
| <b>65</b>               | d    | 610  | 56.688 ( 54.692 - 58.741 ) <sup>a,b,c</sup> |                   |
| <b>GO*</b>              | a    | 457  | 55.987 ( 54.188 - 57.736 ) <sup>c</sup>     | <b>0.040</b>      |
| <b>SGO*</b>             | b    | 242  | 56.244 ( 54.433 - 57.741 )                  |                   |
| <b>RASIG*</b>           | c    | 1048 | 56.399 ( 54.421 - 58.295 ) <sup>a</sup>     |                   |
| <b>DS†</b>              | a    | 34   | 56.115 ( 54.611 - 58.080 ) <sup>b</sup>     | <b>0.018</b>      |
| <b>RASIG†</b>           | b    | 197  | 54.977 ( 53.173 - 56.744 ) <sup>a</sup>     |                   |

Table S6

|                 | MAST vs age       |                   | MAST vs telomere length |                | Telomere length vs age |                   |
|-----------------|-------------------|-------------------|-------------------------|----------------|------------------------|-------------------|
|                 | Spearman          | Pearson           | Spearman                | Pearson        | Spearman               | Pearson           |
| Correl. coeff.  | 0.269             | 0.274             | -0.049                  | -0.071         | -0.151                 | -0.153            |
| Sig. (2-tailed) | <b>&lt; 0.001</b> | <b>&lt; 0.001</b> | <b>0.050</b>            | <b>0.005</b>   | <b>&lt; 0.001</b>      | <b>&lt; 0.001</b> |
| 95% C.I.        | 0.219; 0.311      | 0.229; 0.317      | -0.103; -0.004          | -0.122; -0.019 | -0.201; -0.102         | -0.201; -0.105    |
| N               | 1596              |                   | 1596                    |                | 1596                   |                   |

Table S7

| Factor                                   | Stat | N    | Median (IQ)                                     | MAST                     |                                       |
|------------------------------------------|------|------|-------------------------------------------------|--------------------------|---------------------------------------|
|                                          |      |      |                                                 | P KW* ( $\epsilon^2$ )   | P GLM† ( $\eta^2$ )                   |
| <b>Recruitment centre</b>                |      |      |                                                 |                          |                                       |
| Finland                                  | a    | 93   | 56.159 ( 54.040 - 58.251 ) <sup>c</sup>         | <b>&lt;0.001</b> (0.016) | <b>&lt;0.001</b> (0.015) <sup>§</sup> |
| Italy                                    | b    | 398  | 55.650 ( 53.568 - 57.638 )                      |                          |                                       |
| Austria                                  | c    | 399  | 54.865 ( 52.980 - 57.068 ) <sup>a,d,e,f,g</sup> |                          |                                       |
| Greece                                   | d    | 392  | 55.972 ( 54.238 - 57.958 ) <sup>c</sup>         |                          |                                       |
| Poland                                   | e    | 406  | 56.039 ( 54.052 - 57.895 ) <sup>c</sup>         |                          |                                       |
| Belgium                                  | f    | 262  | 55.971 ( 54.050 - 57.419 ) <sup>c</sup>         |                          |                                       |
| Germany                                  | g    | 358  | 55.838 ( 54.113 - 57.668 ) <sup>c</sup>         |                          |                                       |
| <b>Sex</b>                               |      |      |                                                 |                          |                                       |
| F                                        | a    | 1189 | 55.865 ( 53.826 - 57.800 )                      | 0.153 (0.002)            | 0.054 (0.002) <sup>‡</sup>            |
| M                                        | b    | 1119 | 55.722 ( 53.761 - 57.555 )                      |                          |                                       |
| <b>Classes of BMI (Kg/m<sup>2</sup>)</b> |      |      |                                                 |                          |                                       |
| < 25                                     | a    | 1032 | 55.530 ( 53.577 - 57.378 )                      | <b>0.002</b> (0.007)     | 0.085 (0.009) <sup>°</sup>            |
| 25 to < 30                               | b    | 872  | 56.048 ( 54.131 - 57.866 ) <sup>c</sup>         |                          |                                       |
| 30 and over                              | c    | 399  | 55.845 ( 53.963 - 58.077 ) <sup>b</sup>         |                          |                                       |

Table S8

| Factor                     | Stat                                    | N | Median (IQ) | MAST                                      |                      |                      |
|----------------------------|-----------------------------------------|---|-------------|-------------------------------------------|----------------------|----------------------|
|                            |                                         |   |             | P KW* ( $\epsilon^2$ )                    | P GLM† ( $\eta^2$ )  |                      |
| Vegetables consumption     | < 1 serv./day                           | a | 902         | 55.702 ( 53.818 - 57.437 )                | 0.378 (0.001)        | 0.884 (0.002)        |
|                            | = 1 serv./day                           | b | 1049        | 55.852 ( 53.831 - 57.855 )                |                      |                      |
|                            | ≥ 2 serv./day                           | c | 357         | 55.722 ( 53.674 - 57.585 )                |                      |                      |
| Fruit consumption          | < 1 serv./day                           | a | 810         | 55.600 ( 53.718 - 57.488 )                | 0.083 (0.003)        | 0.975 (0.002)        |
|                            | = 1 serv./day                           | b | 926         | 55.852 ( 53.869 - 57.739 )                |                      |                      |
|                            | ≥ 2 serv./day                           | c | 572         | 56.002 ( 53.712 - 57.834 )                |                      |                      |
| Meat consumption           | ≤ 1 serv./week                          | a | 183         | 55.726 ( 54.069 - 58.235 )                | 0.381 (0.001)        | 0.7 (0.002)          |
|                            | 2-6 serv./week                          | b | 1838        | 55.844 ( 53.825 - 57.698 )                |                      |                      |
|                            | ≥ 7 serv./week                          | c | 287         | 55.484 ( 53.528 - 57.295 )                |                      |                      |
| Vitamin consumption        | No serv./day                            | a | 1441        | 55.771 ( 53.719 - 57.636 )                | 0.469 (0.001)        | 0.906 (0.003)        |
|                            | < 1 serv./day                           | b | 570         | 55.813 ( 53.831 - 57.723 )                |                      |                      |
|                            | ≥ 1 serv./day                           | c | 296         | 55.918 ( 54.156 - 57.784 )                |                      |                      |
| Dairy products consumption | < 1 serv./weekly or never               | a | 267         | 55.588 ( 53.992 - 57.537 )                | 0.306 (0.001)        | 0.537 (0.003)        |
|                            | = 1-6 serv./weekly                      | b | 771         | 55.777 ( 53.665 - 57.458 )                |                      |                      |
|                            | ≥ 1 serv./day                           | c | 1270        | 55.832 ( 53.847 - 57.800 )                |                      |                      |
| Eggs consumption           | < 1 serv./weekly or never               | a | 1036        | 55.835 ( 53.812 - 57.809 )                | 0.504 (< 0.001)      | 0.22 (0.002)         |
|                            | ≥ 1 serv./weekly                        | b | 1272        | 55.788 ( 53.775 - 57.606 )                |                      |                      |
| Fish consumption           | < 1 serv./weekly or never               | a | 1044        | 55.778 ( 53.807 - 57.819 )                | 0.771 (< 0.001)      | 0.089 (0.002)        |
|                            | ≥ 1 serv./weekly                        | b | 1256        | 55.828 ( 53.776 - 57.541 )                |                      |                      |
| French fries consumption   | never                                   | a | 617         | 56.077 ( 54.062 - 58.115 ) <sub>c,b</sub> | <b>0.002</b> (0.006) | 0.08 (0.008)         |
|                            | < 1 serv./week                          | b | 1315        | 55.745 ( 53.765 - 57.535 ) <sub>a</sub>   |                      |                      |
|                            | ≥ 1 serv./week                          | c | 357         | 55.671 ( 53.470 - 57.181 ) <sub>a</sub>   |                      |                      |
| Brown bread Consumption    | < 1 serv./weekly or never               | a | 1154        | 55.794 ( 53.933 - 57.636 )                | 0.065 (0.003)        | 0.189 (0.007)        |
|                            | = 1-6 serv./weekly                      | b | 641         | 55.563 ( 53.652 - 57.560 )                |                      |                      |
|                            | ≥ 1 serv./day                           | c | 513         | 56.107 ( 53.784 - 57.983 )                |                      |                      |
| White bread consumption    | < 1 serv./weekly or never               | a | 863         | 55.942 ( 54.023 - 57.896 )                | <b>0.002</b> (0.007) | <b>0.034</b> (0.010) |
|                            | = 1-6 serv./weekly                      | b | 805         | 55.401 ( 53.599 - 57.400 ) <sub>c</sub>   |                      |                      |
|                            | ≥ 1 serv./day                           | c | 629         | 55.916 ( 54.039 - 57.785 ) <sub>b</sub>   |                      |                      |
| Whole bread consumption    | < 1 serv./weekly or never               | a | 326         | 55.930 ( 53.736 - 58.064 )                | 0.055 (0.003)        | 0.614 (0.005)        |
|                            | = 1-6 serv./weekly                      | b | 1575        | 55.863 ( 53.865 - 57.770 )                |                      |                      |
|                            | ≥ 1 serv./day                           | c | 405         | 55.365 ( 53.637 - 57.057 )                |                      |                      |
| Alcohol consumption        | never                                   | a | 917         | 55.736 ( 53.761 - 57.776 )                | <b>0.023</b> (0.004) | <b>0.001</b> (0.006) |
|                            | Moderate consumption (max 7 serv /week) | b | 816         | 55.615 ( 53.726 - 57.437 ) <sub>c</sub>   |                      |                      |
|                            | > 7 serv /week                          | c | 560         | 56.050 ( 54.198 - 57.819 ) <sub>b</sub>   |                      |                      |
| Smoke habits               | never                                   | a | 1170        | 55.850 ( 53.767 - 57.674 )                | 0.364 (0.001)        | 0.936 (0.004)        |
|                            | former                                  | b | 708         | 55.835 ( 53.896 - 57.775 )                |                      |                      |
|                            | current                                 | c | 430         | 55.605 ( 53.613 - 57.535 )                |                      |                      |



Table S9

| Variable                                                | Stat          | N | Median (IQ) | MAST                                        |                          |                           |
|---------------------------------------------------------|---------------|---|-------------|---------------------------------------------|--------------------------|---------------------------|
|                                                         |               |   |             | P KW* ( $\epsilon^2$ )                      | P GLM† ( $\eta^2$ )      |                           |
| Glucose (mmol/L) quartiles                              | ≤ 4.65        | a | 443         | 55.671 ( 53.764 - 57.310 ) <sup>d</sup>     | <b>&lt;0.001</b> (0.014) | 0.062 (0.020)             |
|                                                         | 4.66 - 5.09   | b | 436         | 55.433 ( 53.391 - 57.277 ) <sup>d</sup>     |                          |                           |
|                                                         | 5.10 - 5.57   | c | 418         | 55.953 ( 53.881 - 57.805 )                  |                          |                           |
|                                                         | ≥ 5.58        | d | 356         | 56.324 ( 54.227 - 58.592 ) <sup>a,b</sup>   |                          |                           |
| Glycosylated haemoglobin A1C (%) quartiles              | ≤ 5.64        | a | 479         | 55.996 ( 54.181 - 57.512 )                  | 0.062 (0.005)            | <b>&lt; 0.001</b> (0.006) |
|                                                         | 5.65 - 5.95   | b | 451         | 56.070 ( 53.902 - 58.030 )                  |                          |                           |
|                                                         | 5.96 - 6.29   | c | 426         | 55.348 ( 53.358 - 57.406 )                  |                          |                           |
|                                                         | ≥ 6.30        | d | 398         | 55.732 ( 53.826 - 57.809 )                  |                          |                           |
| Total cholesterol (mg/dL) tertiles                      | ≤ 220         | a | 515         | 55.622 ( 53.576 - 57.190 )                  | <b>0.009</b> (0.006)     | 0.080 (0.009)             |
|                                                         | 221-257       | b | 547         | 55.662 ( 53.764 - 57.730 )                  |                          |                           |
|                                                         | ≥ 258         | c | 561         | 56.054 ( 54.137 - 58.019 )                  |                          |                           |
| Triglycerides (mmol/L) quartiles                        | < 0.78        | a | 429         | 55.353 ( 53.514 - 57.316 ) <sup>d,b</sup>   | <b>&lt;0.001</b> (0.013) | <b>0.001</b> (0.018)      |
|                                                         | 0.78 - 1.05   | b | 398         | 55.690 ( 53.625 - 57.730 ) <sup>a</sup>     |                          |                           |
|                                                         | 1.06 - 1.50   | c | 401         | 55.805 ( 53.955 - 57.404 ) <sup>d</sup>     |                          |                           |
|                                                         | ≥ 1.51        | d | 425         | 56.200 ( 54.275 - 58.287 ) <sup>a,c</sup>   |                          |                           |
| High density lipoprotein cholesterol (mmol/L) quartiles | ≤ 1.20        | a | 428         | 55.771 ( 53.932 - 57.491 )                  | 0.252 (0.003)            | 0.112 (0.007)             |
|                                                         | 1.21 - 1.47   | b | 402         | 56.012 ( 53.933 - 58.101 )                  |                          |                           |
|                                                         | 1.48 - 1.80   | c | 411         | 55.828 ( 53.847 - 57.776 )                  |                          |                           |
|                                                         | > 1.80        | d | 411         | 55.591 ( 53.576 - 57.629 )                  |                          |                           |
| Low density lipoprotein cholesterol (mmol/L) quartiles  | ≤ 2.7         | a | 416         | 55.707 ( 53.625 - 57.672 )                  | <b>0.008</b> (0.008)     | <b>0.038</b> (0.011)      |
|                                                         | 2.71 - 3.29   | b | 421         | 55.207 ( 53.591 - 57.500 )                  |                          |                           |
|                                                         | 3.30 - 3.84   | c | 410         | 55.775 ( 53.859 - 57.536 )                  |                          |                           |
|                                                         | ≥ 3.86        | d | 406         | 56.168 ( 54.254 - 58.137 )                  |                          |                           |
| Free fatty acids (mg/dL) quartiles                      | < 0.45        | a | 420         | 55.649 ( 53.608 - 57.246 ) <sup>d</sup>     | <b>0.041</b> (0.006)     | 0.357 (0.009)             |
|                                                         | 0.45 - 0.60   | b | 411         | 55.814 ( 53.745 - 58.038 )                  |                          |                           |
|                                                         | 0.61 - 0.79   | c | 420         | 55.622 ( 53.684 - 57.566 )                  |                          |                           |
|                                                         | ≥ 0.80        | d | 400         | 56.097 ( 54.213 - 58.223 ) <sup>a</sup>     |                          |                           |
| Homocysteine (μmol/L) quartiles                         | ≤ 11.05       | a | 464         | 55.840 ( 53.992 - 57.668 )                  | 0.605 (0.001)            | 0.078 (0.003)             |
|                                                         | 11.06 - 14.22 | b | 430         | 55.955 ( 53.875 - 57.667 )                  |                          |                           |
|                                                         | 14.23 - 18.27 | c | 437         | 55.892 ( 53.793 - 57.842 )                  |                          |                           |
|                                                         | > 18.27       | d | 437         | 55.679 ( 53.822 - 57.595 )                  |                          |                           |
| Fibrinogen (mg/ml) quartiles                            | <2.538        | a | 547         | 54.994 ( 53.304 - 56.971 ) <sup>b,c,d</sup> | <b>&lt;0.001</b> (0.024) | <b>0.008</b> (0.026)      |
|                                                         | 2.538-3.279   | b | 550         | 55.738 ( 53.672 - 57.599 ) <sup>a,d</sup>   |                          |                           |
|                                                         | 3.280-4.197   | c | 554         | 56.086 ( 53.994 - 57.896 ) <sup>a</sup>     |                          |                           |
|                                                         | >4.197        | d | 548         | 56.195 ( 54.428 - 58.137 ) <sup>a,b</sup>   |                          |                           |
| C-reactive protein (mg/l) quartiles                     | <0.57         | a | 577         | 56.220 ( 54.317 - 57.684 )                  | 0.110 (0.008)            | 0.272 (0.010)             |
|                                                         | 0.57-1.17     | b | 576         | 56.378 ( 54.397 - 58.094 )                  |                          |                           |
|                                                         | 1.18-2.42     | c | 571         | 56.682 ( 54.936 - 59.002 )                  |                          |                           |
|                                                         | >2.42         | d | 576         | 56.495 ( 54.463 - 58.388 )                  |                          |                           |

Table S10

| Variable                              | Stat          | N | MAST        |                                          |                                           |
|---------------------------------------|---------------|---|-------------|------------------------------------------|-------------------------------------------|
|                                       |               |   | Median (IQ) | P KW* ( $e^2$ )                          | P GLM† ( $\eta^2$ )                       |
| Relative DNMT1 expression, quartiles  | 0.046-0.0980  | a | 460         | 55.826 ( 53.655 - 57.679 ) <sup>d</sup>  | <b>0.001</b> (0.010) <b>0.001</b> (0.015) |
|                                       | 0.0980-0.1293 | b | 418         | 55.416 ( 53.77 - 57.197 ) <sup>d</sup>   |                                           |
|                                       | 0.1294-0.1704 | c | 465         | 55.735 ( 53.712 - 57.666 ) <sup>d</sup>  |                                           |
|                                       | >0.1704       | d | 420         | 56.363 ( 54.433 - 58.16 ) <sup>abc</sup> |                                           |
| Relative DNMT3B expression, quartiles | 0.014-0.155   | a | 446         | 56.018 ( 54.042 - 57.821 )               | 0.181 (0.003) 0.754 (0.004)               |
|                                       | 0.156-0.205   | b | 413         | 56.002 ( 53.764 - 57.732 )               |                                           |
|                                       | 0.206-0.281   | c | 450         | 55.967 ( 53.843 - 57.708 )               |                                           |
|                                       | >0.282        | d | 452         | 55.335 ( 53.866 - 57.448 )               |                                           |
| Relative DNMT3A expression, tertiles  | < 2.93        | a | 49          | 53.214 ( 51.367 - 54.866 ) <sup>c</sup>  | <b>0.017</b> (0.228) <b>0.001</b> (0.291) |
|                                       | 2.93-4.75     | b | 54          | 54.195 ( 53.147 - 56.331 )               |                                           |
|                                       | > 4.75        | c | 50          | 56.181 ( 54.169 - 58.329 ) <sup>a</sup>  |                                           |
| Relative TET1 expression, tertiles    | 0.047-0.149   | a | 49          | 55.623 ( 53.028 - 56.907 )               | 0.529 (0.009) 0.134 (0.038)               |
|                                       | 0.149-0.209   | b | 54          | 55.687 ( 54.417 - 57.398 )               |                                           |
|                                       | >0.209        | c | 50          | 55.548 ( 53.117 - 57.897 )               |                                           |
| Relative TET2 expression, tertiles    | 0.616-3.604   | a | 53          | 56.312 ( 53.497 - 57.486 )               | 0.282 (0.016) 0.524 (0.036)               |
|                                       | 3.605-5.855   | b | 50          | 55.358 ( 53.029 - 57.398 )               |                                           |
|                                       | >5.855        | c | 50          | 55.364 ( 53.210 - 57.505 )               |                                           |
| Relative TET3 expression, tertiles    | 1.366-2.638   | a | 51          | 56.166 ( 53.966 - 57.888 ) <sup>c</sup>  | <b>0.027</b> (0.043) <b>0.024</b> (0.068) |
|                                       | 2.639-3.363   | b | 54          | 55.971 ( 53.400 - 57.323 )               |                                           |
|                                       | >3.363        | c | 48          | 54.449 ( 52.590 - 56.808 ) <sup>a</sup>  |                                           |
| Relative TDG expression, tertiles     | 0.095-0.158   | a | 48          | 55.971 ( 53.764 - 57.78 )                | 0.583 (0.007) 0.837 (0.014)               |
|                                       | 0.159-0.209   | b | 42          | 55.364 ( 53.400 - 56.933 )               |                                           |
|                                       | >0.209        | c | 47          | 54.954 ( 53.029 - 57.486 )               |                                           |

Table S11

| Variable                                       | Stat        | N | MAST        |                                           |                              |
|------------------------------------------------|-------------|---|-------------|-------------------------------------------|------------------------------|
|                                                |             |   | Median (IQ) | P KW* ( $\epsilon^2$ )                    | P GLM† ( $\eta^2$ )          |
| White blood cell count ( $n^* \times 10^9/l$ ) | < 5.00      | a | 613         | 55.585 ( 53.655 - 57.636 )                | 0.288 (0.002) 0.621 (0.003)  |
|                                                | 5.00 - 5.89 | b | 542         | 55.851 ( 53.978 - 57.601 )                |                              |
|                                                | 5.90 - 6.91 | c | 551         | 55.973 ( 53.955 - 57.805 )                |                              |
|                                                | > 6.91      | d | 582         | 55.707 ( 53.769 - 57.639 )                |                              |
| Monocyte count ( $n^*/\mu l$ )                 | < 364       | a | 477         | 55.624 ( 53.568 - 57.666 )                | 0.322 (0.002) 0.645 (0.002)  |
|                                                | 364 - 452   | b | 505         | 55.890 ( 53.909 - 57.658 )                |                              |
|                                                | 452 - 566   | c | 758         | 55.682 ( 53.736 - 57.668 )                |                              |
|                                                | > 566       | d | 515         | 55.916 ( 54.113 - 57.8 )                  |                              |
| Lymphocyte count ( $n^*/\mu l$ )               | < 1540      | a | 530         | 55.146 ( 53.381 - 57.303 ) <sup>b,d</sup> | 0.001 (0.011) <0.001 (0.008) |
|                                                | 1540 - 1890 | b | 499         | 55.994 ( 53.739 - 57.647 ) <sup>a</sup>   |                              |
|                                                | 1891 - 2281 | c | 759         | 55.662 ( 53.794 - 57.732 )                |                              |
|                                                | > 2281      | d | 468         | 56.120 ( 54.375 - 57.946 ) <sup>a</sup>   |                              |
| Lymphocytes to monocytes ratio                 | < 3.35      | a | 522         | 55.415 ( 53.518 - 57.297 ) <sup>d</sup>   | 0.035 (0.004) 0.001 (0.009)  |
|                                                | 3.35-4.20   | b | 520         | 55.687 ( 53.947 - 57.599 )                |                              |
|                                                | 4.20-5.24   | c | 773         | 55.798 ( 53.763 - 57.742 )                |                              |
|                                                | > 5.24      | d | 441         | 56.033 ( 54.259 - 58.007 ) <sup>a</sup>   |                              |
| Neutrophil count ( $n^* \times 10^9/l$ )       | < 2.56      | a | 480         | 56.104 ( 53.992 - 58.053 ) <sup>d</sup>   | 0.024 (0.005) 0.026 (0.009)  |
|                                                | 2.56-3.20   | b | 508         | 55.616 ( 53.736 - 57.415 )                |                              |
|                                                | 3.20-3.90   | c | 775         | 55.808 ( 53.902 - 57.729 )                |                              |
|                                                | $\geq 3.99$ | d | 500         | 55.481 ( 53.503 - 57.378 ) <sup>a</sup>   |                              |
| Eosinophil count ( $n^*/\mu l$ )               | $\geq 100$  | a | 523         | 55.755 ( 53.774 - 57.464 )                | 0.507 (0.001) 0.758 (0.003)  |
|                                                | 101-151     | b | 502         | 55.892 ( 53.707 - 57.895 )                |                              |
|                                                | 152-230     | c | 776         | 55.616 ( 53.670 - 57.666 )                |                              |
|                                                | $\geq 231$  | d | 460         | 55.885 ( 54.210 - 57.453 )                |                              |
| Basophil count ( $n^*/\mu l$ )                 | $\leq 20.4$ | a | 531         | 55.784 ( 53.827 - 57.325 )                | 0.636 (0.001) 0.882 (0.002)  |
|                                                | 20.5-32.4   | b | 590         | 55.839 ( 53.950 - 57.895 )                |                              |
|                                                | 32.5-48.8   | c | 562         | 55.622 ( 53.585 - 57.729 )                |                              |
|                                                | > 48.8      | d | 573         | 55.824 ( 53.833 - 57.611 )                |                              |

Table S12

| Model                          | 1                            | 2                            | 3                            | 4                            | 5                            | 6                            | 7                            | 8                            | 9                            | 10                           | 11                           | 12                           | 13                          | 14                           | 15                           | 16                           | 17                           | 18                           | 19                           | 20                          | 21                          |
|--------------------------------|------------------------------|------------------------------|------------------------------|------------------------------|------------------------------|------------------------------|------------------------------|------------------------------|------------------------------|------------------------------|------------------------------|------------------------------|-----------------------------|------------------------------|------------------------------|------------------------------|------------------------------|------------------------------|------------------------------|-----------------------------|-----------------------------|
| N                              | 1961                         | 1961                         | 1961                         | 1916                         | 1916                         | 1916                         | 1914                         | 1913                         | 1908                         | 1801                         | 1800                         | 1552                         | 1447                        | 1915                         | 1901                         | 1900                         | 1801                         | 1801                         | 1789                         | 1758                        | 1434                        |
|                                | Wald<br>Sig.                 | Wald<br>Sig.                 | Wald<br>Sig.                 | Wald<br>Sig.                 | Wald<br>Sig.                 | Wald<br>Sig.                 | Wald<br>Sig.                 | Wald<br>Sig.                 | Wald<br>Sig.                 | Wald<br>Sig.                 | Wald<br>Sig.                 | Wald<br>Sig.                 | Wald<br>Sig.                | Wald<br>Sig.                 | Wald<br>Sig.                 | Wald<br>Sig.                 | Wald<br>Sig.                 | Wald<br>Sig.                 | Wald<br>Sig.                 | Wald<br>Sig.                | Wald<br>Sig.                |
| Age group                      | 134.571<br><b>&lt; 0.001</b> | 133.299<br><b>&lt; 0.001</b> | 134.080<br><b>&lt; 0.001</b> | 130.890<br><b>&lt; 0.001</b> | 131.350<br><b>&lt; 0.001</b> | 131.054<br><b>&lt; 0.001</b> | 133.570<br><b>&lt; 0.001</b> | 111.090<br><b>&lt; 0.001</b> | 127.429<br><b>&lt; 0.001</b> | 116.492<br><b>&lt; 0.001</b> | 117.190<br><b>&lt; 0.001</b> | 101.278<br><b>&lt; 0.001</b> | 72.680<br><b>&lt; 0.001</b> | 116.452<br><b>&lt; 0.001</b> | 119.128<br><b>&lt; 0.001</b> | 131.372<br><b>&lt; 0.001</b> | 115.957<br><b>&lt; 0.001</b> | 105.258<br><b>&lt; 0.001</b> | 115.782<br><b>&lt; 0.001</b> | 81.760<br><b>&lt; 0.001</b> | 64.037<br><b>&lt; 0.001</b> |
| Recruitment center             |                              | 2.203<br>0.138               | 2.181<br>0.140               | 3.533<br>0.060               | 3.503<br>0.061               | 3.509<br>0.061               | 4.205<br><b>0.040</b>        | 4.426<br>0.064               | 4.146<br><b>0.042</b>        | 3.598<br>0.074               | 3.094<br>0.079               | 2.764<br>0.096               | 2.635<br>0.105              | 4.426<br><b>0.035</b>        | 3.347<br>0.067               | 3.107<br>0.078               | 2.989<br>0.084               | 3.763<br>0.052               | 3.868<br><b>0.049</b>        | 5.008<br><b>0.025</b>       | 3.647<br>0.056              |
| Sex                            |                              |                              | 3.773<br>0.052               | 3.348<br>0.067               | 3.275<br>0.070               | 3.265<br>0.071               | 1.373<br>0.241               | 2.009<br>0.156               | 3.662<br>0.056               | 4.866<br><b>0.027</b>        | 5.616<br><b>0.018</b>        | 1.058<br>0.604               | 0.935<br>0.334              | 4.461<br><b>0.035</b>        | 2.270<br>0.132               | 3.564<br>0.059               | 3.800<br>0.051               | 5.691<br><b>0.017</b>        | 4.200<br><b>0.040</b>        | 4.074<br><b>0.044</b>       | 2.250<br>0.134              |
| Lymphocytes to monocytes ratio |                              |                              |                              | 3.310<br>0.069               | 3.371<br>0.066               | 3.334<br>0.068               | 3.345<br>0.067               | 3.289<br>0.070               | 3.194<br>0.074               | 2.839<br>0.092               | 2.525<br>0.112               | 2.353<br>0.125               | 1.779<br>0.182              | 3.720<br>0.054               | 2.690<br>0.101               | 3.309<br>0.069               | 2.731<br>0.098               | 2.572<br>0.109               | 3.126<br>0.077               | 2.554<br>0.110              | 1.935<br>0.164              |
| Neutrophils                    |                              |                              |                              |                              | 0.644<br>0.422               |                              |                              |                              |                              |                              |                              |                              | 0.552<br>0.450              |                              |                              |                              |                              |                              |                              | 0.453<br>0.501              | 0.426<br>0.514              |
| Lymphocytes                    |                              |                              |                              |                              |                              | 0.271<br>0.603               |                              |                              |                              |                              |                              |                              | 0.201<br>0.654              |                              |                              |                              |                              |                              |                              | 0.101<br>0.751              | 0.118<br>0.731              |
| Alcohol consumption            |                              |                              |                              |                              |                              |                              | 6.426<br><b>0.011</b>        |                              |                              |                              |                              |                              | 4.011<br><b>0.045</b>       |                              |                              |                              |                              |                              |                              | 4.952<br><b>0.026</b>       | 3.820<br><b>0.050</b>       |
| Fibrinogen                     |                              |                              |                              |                              |                              |                              |                              | 6.457<br><b>0.011</b>        |                              |                              |                              |                              | 3.604<br>0.058              |                              |                              |                              |                              |                              |                              | 2.517<br>0.113              | 2.296<br>0.130              |
| White bread consumption        |                              |                              |                              |                              |                              |                              |                              |                              | 0.724<br>0.395               |                              |                              |                              | 0.032<br>0.858              |                              |                              |                              |                              |                              |                              | 0.337<br>0.562              | 0.187<br>0.666              |
| LDL-Cholesterol                |                              |                              |                              |                              |                              |                              |                              |                              |                              | 4.864<br><b>0.027</b>        |                              |                              | 1.850<br>0.174              |                              |                              |                              |                              |                              |                              | 1.747<br>0.186              | 0.630<br>0.427              |
| Triglycerides                  |                              |                              |                              |                              |                              |                              |                              |                              |                              |                              | 2.899<br>0.089               |                              | 1.825<br>0.177              |                              |                              |                              |                              |                              |                              | 0.178<br>0.673              | 0.514<br>0.474              |
| Relative DNMT1 expression      |                              |                              |                              |                              |                              |                              |                              |                              |                              |                              |                              | 7.481<br><b>0.006</b>        | 4.578<br><b>0.032</b>       |                              |                              |                              |                              |                              |                              |                             | 4.398<br><b>0.036</b>       |
| BMI                            |                              |                              |                              |                              |                              |                              |                              |                              |                              |                              |                              |                              |                             | 5.978<br><b>0.014</b>        |                              |                              |                              |                              |                              | 1.343<br>0.247              | 0.793<br>0.373              |
| French fries consumption       |                              |                              |                              |                              |                              |                              |                              |                              |                              |                              |                              |                              |                             |                              | 2.841<br>0.092               |                              |                              |                              |                              | 1.349<br>0.245              | 1.210<br>0.271              |
| Glycated haemoglobin (HbA1c)   |                              |                              |                              |                              |                              |                              |                              |                              |                              |                              |                              |                              |                             |                              |                              | 1.576<br>0.209               |                              |                              |                              | 9.273<br><b>0.002</b>       | 9.015<br><b>0.003</b>       |
| Cholesterol                    |                              |                              |                              |                              |                              |                              |                              |                              |                              |                              |                              |                              |                             |                              |                              | 2.208<br>0.137               |                              |                              |                              | 0.325<br>0.569              | 0.028<br>0.868              |
| Glucose                        |                              |                              |                              |                              |                              |                              |                              |                              |                              |                              |                              |                              |                             |                              |                              |                              |                              | 5.014<br><b>0.025</b>        |                              | 7.886<br><b>0.005</b>       | 7.609<br><b>0.006</b>       |
| Free fatty acids               |                              |                              |                              |                              |                              |                              |                              |                              |                              |                              |                              |                              |                             |                              |                              |                              |                              |                              | 1.638<br>0.201               | 0.874<br>0.350              | 0.287<br>0.592              |

Table S13

| Model                          | 1                      | 2                      | 3                      | 4                           | 5                           | 6                           | 7                           | 8                           | 9                           | 10                          | 11                          | 12                          | 13                          | 14                     | 15                          | 16                          | 17                          | 18                          | 19                          | 20                          | 21                          | 22                     |                |                       |                       |
|--------------------------------|------------------------|------------------------|------------------------|-----------------------------|-----------------------------|-----------------------------|-----------------------------|-----------------------------|-----------------------------|-----------------------------|-----------------------------|-----------------------------|-----------------------------|------------------------|-----------------------------|-----------------------------|-----------------------------|-----------------------------|-----------------------------|-----------------------------|-----------------------------|------------------------|----------------|-----------------------|-----------------------|
| N                              | 1408                   | 1408                   | 1408                   | 1408                        | 1361                        | 1361                        | 1359                        | 1358                        | 1358                        | 1307                        | 1307                        | 1307                        | 1118                        | 1069                   | 1360                        | 1350                        | 1347                        | 1307                        | 1307                        | 1304                        | 1273                        | 1057                   |                |                       |                       |
|                                | Wald<br>Sig.           | Wald<br>Sig.           | Wald<br>Sig.           | Wald<br>Sig.                | Wald<br>Sig.                | Wald<br>Sig.                | Wald<br>Sig.                | Wald<br>Sig.                | Wald<br>Sig.                | Wald<br>Sig.                | Wald<br>Sig.                | Wald<br>Sig.                | Wald<br>Sig.                | Wald<br>Sig.           | Wald<br>Sig.                | Wald<br>Sig.                | Wald<br>Sig.                | Wald<br>Sig.                | Wald<br>Sig.                | Wald<br>Sig.                | Wald<br>Sig.                | Wald<br>Sig.           |                |                       |                       |
| Subject group (GO, SGO, RASIG) | 12.935<br><b>0.002</b> | 13.170<br><b>0.001</b> | 13.503<br><b>0.001</b> | 12.483<br><b>0.002</b>      | 12.504<br><b>0.002</b>      | 12.511<br><b>0.002</b>      | 12.504<br><b>0.002</b>      | 11.126<br><b>0.004</b>      | 11.842<br><b>0.003</b>      | 13.598<br><b>0.001</b>      | 10.497<br><b>0.005</b>      | 9.892<br><b>0.007</b>       | 10.960<br><b>0.004</b>      | 8.485<br><b>0.014</b>  | 10.894<br><b>0.004</b>      | 11.247<br><b>0.004</b>      | 12.013<br><b>0.002</b>      | 10.420<br><b>0.005</b>      | 9.627<br><b>0.008</b>       | 10.350<br><b>0.006</b>      | 6.224<br><b>0.045</b>       | 5.480<br><b>0.065</b>  |                |                       |                       |
| Recruitment centre             |                        | 1.330<br>0.249         | 1.219<br>0.270         | 1.495<br>0.222              | 0.675<br>0.411              | 0.673<br>0.412              | 0.672<br>0.412              | 0.427<br>0.513              | 0.521<br>0.470              | 0.660<br>0.417              | 0.283<br>0.595              | 0.295<br>0.587              | 0.028<br>0.867              | 0.153<br>0.695         | 0.304<br>0.581              | 0.461<br>0.497              | 0.080<br>0.777              | 0.279<br>0.598              | 0.064<br>0.786              | 0.245<br>0.621              | 1.987<br>0.159              | 5.047<br><b>0.025</b>  |                |                       |                       |
| Sex                            |                        |                        | 1.441<br>0.230         | 1.810<br>0.178              | 1.673<br>0.196              | 1.681<br>0.195              | 1.679<br>0.195              | 1.875<br>0.171              | 0.933<br>0.334              | 1.207<br>0.272              | 1.789<br>0.181              | 2.121<br>0.145              | 0.585<br>0.444              | 0.518<br>0.472         | 2.079<br>0.149              | 1.731<br>0.188              | 0.866<br>0.352              | 1.505<br>0.220              | 2.448<br>0.118              | 2.057<br>0.152              | 2.045<br>0.153              | 1.238<br>0.266         |                |                       |                       |
| Age                            |                        |                        |                        | 16.330<br><b>&lt; 0.001</b> | 15.993<br><b>&lt; 0.001</b> | 15.974<br><b>&lt; 0.001</b> | 15.968<br><b>&lt; 0.001</b> | 16.303<br><b>&lt; 0.001</b> | 15.533<br><b>&lt; 0.001</b> | 15.842<br><b>&lt; 0.001</b> | 15.947<br><b>&lt; 0.001</b> | 14.917<br><b>&lt; 0.001</b> | 13.841<br><b>&lt; 0.001</b> | 12.077<br><b>0.001</b> | 15.652<br><b>&lt; 0.001</b> | 17.048<br><b>&lt; 0.001</b> | 13.121<br><b>&lt; 0.001</b> | 15.265<br><b>&lt; 0.001</b> | 13.623<br><b>&lt; 0.001</b> | 14.737<br><b>&lt; 0.001</b> | 12.592<br><b>&lt; 0.001</b> | 11.409<br><b>0.001</b> |                |                       |                       |
| Lymphocytes to monocytes ratio |                        |                        |                        |                             | 3.638<br>0.056              | 3.634<br>0.057              | 3.636<br>0.057              | 3.496<br>0.062              | 3.826<br><b>0.050</b>       | 3.723<br>0.054              | 2.663<br>0.103              | 2.773<br>0.096              | 6.827<br><b>0.009</b>       | 4.671<br><b>0.031</b>  | 3.652<br>0.056              | 3.864<br><b>0.049</b>       | 3.231<br>0.072              | 2.732<br>0.098              | 2.729<br>0.099              | 2.811<br>0.094              | 2.549<br>0.110              | 5.096<br><b>0.024</b>  |                |                       |                       |
| Neutrophils                    |                        |                        |                        |                             |                             | 0.011<br>0.915              |                             |                             |                             |                             |                             |                             |                             | 0.358<br>0.550         |                             |                             |                             |                             |                             |                             |                             | 0.165<br>0.685         | 0.616<br>0.433 |                       |                       |
| Lymphocytes                    |                        |                        |                        |                             |                             |                             | 0.007<br>0.931              |                             |                             |                             |                             |                             |                             | 0.344<br>0.557         |                             |                             |                             |                             |                             |                             |                             |                        | 0.159<br>0.690 | 0.601<br>0.438        |                       |
| White bread consumption        |                        |                        |                        |                             |                             |                             |                             | 0.346<br>0.556              |                             |                             |                             |                             |                             | 0.013<br>0.909         |                             |                             |                             |                             |                             |                             |                             |                        | 0.630<br>0.427 | 0.179<br>0.673        |                       |
| Alcohol consumption            |                        |                        |                        |                             |                             |                             |                             |                             | 2.051<br>0.152              |                             |                             |                             |                             | 1.345<br>0.246         |                             |                             |                             |                             |                             |                             |                             |                        | 0.476<br>0.490 | 0.937<br>0.333        |                       |
| Fibrinogen                     |                        |                        |                        |                             |                             |                             |                             |                             |                             | 1.972<br>0.160              |                             |                             |                             | 2.584<br>0.108         |                             |                             |                             |                             |                             |                             |                             |                        | 0.514<br>0.473 | 0.947<br>0.331        |                       |
| LDL-Cholesterol                |                        |                        |                        |                             |                             |                             |                             |                             |                             |                             | 2.699<br>0.100              |                             |                             | 0.962<br>0.327         |                             |                             |                             |                             |                             |                             |                             |                        | 1.397<br>0.237 | 0.938<br>0.333        |                       |
| Triglycerides                  |                        |                        |                        |                             |                             |                             |                             |                             |                             |                             |                             | 0.225<br>0.635              |                             | 0.019<br>0.890         |                             |                             |                             |                             |                             |                             |                             |                        | 0.371<br>0.542 | 0.180<br>0.672        |                       |
| Relative DNMT1 expression      |                        |                        |                        |                             |                             |                             |                             |                             |                             |                             |                             |                             | 4.086<br><b>0.043</b>       | 4.369<br><b>0.037</b>  |                             |                             |                             |                             |                             |                             |                             |                        |                | 3.209<br>0.073        |                       |
| BMI                            |                        |                        |                        |                             |                             |                             |                             |                             |                             |                             |                             |                             |                             |                        | 7.329<br><b>0.007</b>       |                             |                             |                             |                             |                             |                             |                        |                | 6.073<br><b>0.014</b> | 5.417<br><b>0.020</b> |
| Glycated haemoglobin (HbA1c)   |                        |                        |                        |                             |                             |                             |                             |                             |                             |                             |                             |                             |                             |                        | 0.174<br>0.676              |                             |                             |                             |                             |                             |                             |                        |                | 4.108<br><b>0.043</b> | 5.145<br><b>0.023</b> |
| French fries consumption       |                        |                        |                        |                             |                             |                             |                             |                             |                             |                             |                             |                             |                             |                        |                             |                             | 8.602<br><b>0.003</b>       |                             |                             |                             |                             |                        |                | 6.698<br><b>0.010</b> | 5.804<br><b>0.016</b> |
| Cholesterol                    |                        |                        |                        |                             |                             |                             |                             |                             |                             |                             |                             |                             |                             |                        |                             |                             |                             | 0.829<br>0.362              |                             |                             |                             |                        |                | 0.294<br>0.588        | 0.227<br>0.633        |
| Glucose                        |                        |                        |                        |                             |                             |                             |                             |                             |                             |                             |                             |                             |                             |                        |                             |                             |                             |                             |                             | 2.462<br>0.117              |                             |                        |                | 4.540<br><b>0.033</b> | 5.262<br><b>0.022</b> |
| Free fatty acids               |                        |                        |                        |                             |                             |                             |                             |                             |                             |                             |                             |                             |                             |                        |                             |                             |                             |                             |                             |                             | 0.056<br>0.812              |                        |                | 0.304<br>0.581        | 0.088<br>0.767        |

## Legends to supplementary tables

### Table S1

#### **Subtelomeric DNA methylation in the RASIG population stratified by age**

\*KW test: nonparametric comparison by the Kruskal–Wallis test of the CpG methylation level between age groups. Data are reported as median and interquartile range (IQ). Pairwise comparisons, adjusted for multiple comparisons, were performed by the Mann–Whitney U-test (comparisons with  $p < 0.05$  are marked by the associated superscripts).

†GLM test: groups comparison by generalized linear model analysis. The model included the effects of sex, recruitment centre and age as covariates ( $p$  values refer to age groups). Bold text indicates a statistically significant  $p$  value. Definition of abbreviations is provided in the supplementary list.

### Table S2

#### **Correlation between subtelomeric DNA methylation and age in the RASIG population**

\*The confidence intervals for both Pearson (parametric) and Spearman (non-parametric) correlation coefficients are based on 1000 bootstrap re-samples. Stratification was by sex and recruitment centre. Bold text indicates a statistically significant  $p$  value.

### Table S3

#### **Comparison of different linear regression models for subtelomeric DNA methylation to age in the RASIG population**

Bold text indicates a statistically significant  $p$  value.

### Table S4

#### **Linear regression model**

\*The standard errors and confidence intervals for Pearson correlation coefficients are based on 1000 bootstrap re-samples. Stratification was by sex and recruitment centre. Bold text indicates a statistically significant  $p$  value.

### Table S5

#### **MAST in age-stratified RASIG, GO, SGO and DS**

<sup>§</sup>KW test: nonparametric comparison by the Kruskal–Wallis test of MAST between age groups (RASIG) and between subject groups (RASIG, GO, SGO and DS). Data are reported as median and interquartile range (IQ). Pairwise comparisons, adjusted for multiple comparisons, were performed by the Mann–Whitney U-test (comparisons with  $p < 0.05$  are marked by the associated superscripts). Bold text indicates a statistically significant  $p$  value.

\*Age range was 55-75 years.

†Age range was 35-54 years.

### Table S6

#### **Correlation between MAST and telomere length in RASIG**

Confidence intervals for correlation coefficients are based on 1000 bootstrap re-samples. Stratification was by sex and recruitment centre (MAST vs age and telomere length vs age) and by sex recruitment centre and age (MAST vs telomere length). Bold text indicates a statistically significant  $p$  value.

### Table S7

### **Effect of recruitment centre, sex and BMI on MAST in RASIG**

\*KW test: nonparametric comparison by the Kruskal–Wallis test of MAST level between sample groups categorized by recruitment centre, sex and BMI. Data are reported as median and interquartile range (IQ). Pairwise comparisons, adjusted for multiple comparisons, were performed by the Mann–Whitney U-test (comparisons with  $p < 0.05$  are marked by the associated superscripts).

†GLM test: groups comparison by generalized linear model analysis. The models included the effects of sex (<sup>§</sup>), recruitment centre (<sup>‡</sup>) or both (<sup>ª</sup>) as covariates ( $p$  values refer to the categories). Bold text indicates a statistically significant  $p$  value. Definition of abbreviations is provided in the supplementary list.

### **Table S8**

#### **Influence of dietary habits and lifestyle on MAST in RASIG**

\*KW test: nonparametric comparison by the Kruskal–Wallis test of MAST level between sample groups categorized by the indicated factor intervals. Data are reported as median and interquartile range (IQ). Pairwise comparisons, adjusted for multiple comparisons, were performed by the Mann–Whitney U-test (comparisons with  $p < 0.05$  are marked by the associated superscripts).

†GLM test: groups comparison by generalized linear model analysis. The models included the effects of sex and recruitment centre as covariates ( $p$  values refer to the categories). Data were obtained after questionnaires as described in Moreno-Villanueva et al. [33]. Bold text indicates a statistically significant  $p$  value.

### **Table S9**

#### **Influence of cardiovascular and diabetes risk biomarkers on MAST in RASIG**

\*KW test: nonparametric comparison by the Kruskal–Wallis test of MAST level between sample groups categorized by the indicated variable intervals. Data are reported as median and interquartile range (IQ). Pairwise comparisons, adjusted for multiple comparisons, were performed by the Mann–Whitney U-test (comparisons with  $p < 0.05$  are marked by the associated superscripts).

†GLM test: groups comparison by generalized linear model analysis. The models included the effects of sex and recruitment centre as covariates ( $p$  values refer to the categories). Bold text indicates a statistically significant  $p$  value. Definition of abbreviations is provided in the supplementary list. Details about the analytic procedures for the measurement of the parameters are given in Moreno-Villanueva et al. [32].

### **Table S10**

#### **Influence of the expression of DNA methylation machinery components on MAST in RASIG**

\*KW test: nonparametric comparison by the Kruskal–Wallis test of MAST level between sample groups categorized by the indicated variable intervals. Data are reported as median and interquartile range (IQ). Pairwise comparisons, adjusted for multiple comparisons, were performed by the Mann–Whitney U-test (comparisons with  $p < 0.05$  are marked by the associated superscripts).

†GLM test: groups comparison by generalized linear model analysis. The models included the effects of sex and recruitment centre as covariates ( $p$  values refer to the categories). Bold text indicates a statistically significant  $p$  value. Definition of abbreviations is provided in the supplementary list. Details about the analytic procedures for the measurement of the parameters are given in Ciccarone et al. [36] and in Valentini et al. [67].

### **Table S11**

#### **Influence of haematological factors on MAST in RASIG**

\*KW test: nonparametric comparison by the Kruskal–Wallis test of MAST level between sample groups categorized by the indicated variable intervals. Data are reported as median and interquartile range (IQ). Pairwise comparisons, adjusted for multiple comparisons, were performed by the Mann–Whitney U-test (comparisons with  $p < 0.05$  are marked by the associated superscripts).

†GLM test: groups comparison by generalized linear model analysis. The models included the effects of sex and recruitment centre as covariates ( $p$  values refer to the categories). Bold text indicates a statistically significant  $p$  value. Definition of abbreviations is provided in the supplementary list. Details about the analytic procedures for the measurement of the parameters are given in Moreno-Villanueva et al. [32].

#### **Table S12**

##### **Contribution of selected variables and covariates on age-related changes of MAST in RASIG**

Models: MAST (s), response variable; age group (o), factor variable; sex (n), recruitment centre (n), white bread consumption (s), alcohol consumption (s), triglycerides (s), LDL cholesterol (s), lymphocytes (s), ratio of lymphocyte to monocyte (s), neutrophils (s), fibrinogen (s), DNMT1 expression (s), BMI (s), French fries consumption (s), glycated haemoglobin (s), cholesterol (s), serum glucose (s) and free fatty acids (s) were included as covariates (o = ordinal variable; n = nominal variable; s = scale variable). Bold text indicates a statistically significant  $p$  value.

#### **Table S13**

##### **Contribution of selected variables and covariates on group-related (GO, SGO and RASIG) changes of MAST in individuals aged > 54 years.**

Models: MAST (s), response variable; subject group (o), factor variable; age (s), sex (n), recruitment centre (n), white bread consumption (s), alcohol consumption (s), triglycerides (s), LDL cholesterol (s), lymphocytes (s), ratio of lymphocyte to monocyte (s), neutrophils (s), fibrinogen (s), DNMT1 expression (s), BMI (s), French fries consumption (s), glycated haemoglobin (s), cholesterol (s), serum glucose (s) and free fatty acids (s) were included as covariates (o = ordinal variable; n = nominal variable; s = scale variable).
